# Supplementary material for: Interpretable machine learning model for predicting low birth weight in singleton pregnancies: a retrospective cohort study
Source: Research Square preprint supplement (doi:10.21203/rs.3.rs-6343799/v1), 2025-05-22
Supplement: Supplementary file 1 [file 4d781b0c44a73ad9045a4064.docx]

Supplementary Material Table 5 The variable assignments used in the analysis

| Variable | Description | Group |
| --- | --- | --- |
| Newborn weight | Newborn weight | 1: <2500g=LBW, 0: 2500-4000=NBW |
| Maternal age | Maternal age | ≤25=1, 25-35=2, ≥35=3 |
| Parity | Parity | Primiparous=1, Multiparous=2 |
| Gestational age | Gestational age | 28-36+6=1,37-41=2 |
| Newborn gender | Newborn gender | Male=1,Female=2 |
| BMI | Maternal BMI | 1: <18=Under weight, 2: 18-28=Normal weight, 3:>28=Over weight |
| Occupation | Maternal occupation | Employee=1, Housewife=2 |
| HDP | Gestational hypertension | Yes=1, No=0 |
| GDM | Gestational diabetes | Yes=1, No=0 |
| CSP | Cesarean scar pregnancy | Yes=1, No=0 |
| PROM | Premature rupture of membranes | Yes=1, No=0 |
| CIC | Pregnancy Cervical Incompetence | Yes=1, No=0 |
| Fetal_distress | Fetal_distress | Yes=1, No=0 |
| Uterine_rupture | Uterine_rupture | Yes=1, No=0 |
| Hypoproteinemia | Hypoproteinemia | Yes=1, No=0 |
